# Supplementary material for: Cellular Proteins Associated with the Interior and Exterior of Vesicular Stomatitis Virus Virions
Source: PLoS One. 2014 Aug 8;9(8):e104688. doi: 10.1371/journal.pone.0104688 (PMC4126742; doi:10.1371/journal.pone.0104688)
Supplement: Table S1 — Cellular proteins identified in whole and ProK treated VSV virions following 1-D SDS-PAGE and UPLC-MS/MS. (XLSX) [file pone.0104688.s001.xlsx]

## Sheet: Sheet1
	Accession #a	Gene Namea	Gene Abbreviationa	Molecular Weighta	Whole VSV Virions												ProK Treated VSV Virions
					Technical Replicate 1					Technical Replicate 2					Mean Total Spectra	Mean emPAi	Technical Replicate 1					Technical Replicate 2					Technical Replicate 3					Mean Total Spectra	Mean emPAi
					Slice(s) Identifiedb	Total Spectra	Unique Peptides	% Coverage	emPAI	Slice(s) Identifiedb	Total Spectra	Unique Peptides	% Coverage	emPAI			Slice(s) Identifiedb	Total Spectra	Unique Peptides	% Coverage	emPAi	Slice(s) Identifiedb	Total Spectra	Unique Peptides	% Coverage	emPAI	Slice(s) Identifiedb	Total Spectra	Unique Peptides	% Coverage	emPAI
VSV	B7UCZ2	Nucleocapsid protein	N	47.4kDa	14,15,16,17,18,19,20,21,22,23,24,25,26,27	1366	37	0.79		14,15,16,17,18,19,20,21,22,23,24,26,27	1097	37	0.77		1231.5		1,2,3,4,5,6,7,8,9,10,11,13	1477	40	0.82		1,2,3,4,5,6,7,8,9,10,11,13	1512	40	0.82		1,2,3,4,5,6,7,8,9,10,11,13	1270	36	0.77		1419.67
	B7UCZ3	Phosphoprotein	P	29.9kDa	14,15,16,17,18,19,20,21,24,25	203	15	0.59		14,15,16,17,18,19,20,22,24	157	13	0.56		180		1,2,3,4,5,6,7,8,9,10,11,13	252	15	0.56		1,2,3,4,5,6,7,8,9,10,11,13	254	14	0.56		1,2,3,4,5,6,7,8,9,10,11,13	206	15	0.56		237.333
	B7UCZ4	Matrix protein	M	26.0kDa	14,15,16,17,18,19,20,21,22,23,24,25,26,27	697	5	0.77		14,15,16,17,18,19,20,21,22,23,24,26,27	609	17	0.78		653		1,2,3,4,5,6,7,8,9,10,11,12,13	723	16	0.77		1,2,3,4,5,6,7,8,9,10,11,12,13	751	18	0.75		1,2,3,4,5,6,7,8,9,10,11,13	712	17	0.72		728.667
	B7UCZ5	Glycoprotein	G	57.5kDa	14,15,16,17,19,20,21,22,23,24,25,26,27	636	28	0.67		14,15,16,17,19,20,21,22,23,24,25,26,27	552	27	0.68		594		1,2,6,7,8,11	65	13	0.33		1,2,3,4,6,7,9,11	74	12	0.31		1,2,3,6,7,8,9	50	12	0.33		63
	B7UCZ7	Polymerase	L	241.0kDa	14,16,17,19,20,21,22,23,24,25,26,27	751	112	0.54		14,17,19,20,21,22,23,24,25,26,27	1277	133	0.62		1014		1,2,4,6,7,8,9,10,11,12,13	2021	136	0.61		1,4,6,7,8,9,10,11,12,13	2053	134	0.6		1,2,4,6,7,8,9,10,11,12,13	1732	135	0.62		1935.33
Identified in Both Sample Types	P13595	Neural cell adhesion molecule 1	Ncam1	119.4kDa	24,26	50	15	0.17	1.65	16,24,25,26	60	13	0.15	1.8	55	1.725	3,4	8	3	0.022	0.23	3	7	3	0.014	0.21	3	4	3	0.021	0.11	6.33333	0.183333
	P62984	Ubiquitin-60S ribosomal protein L40	Uba52	14.7kDa	14,16,17,18,19,20,21,22,23,24,25,26	61	7	0.5		14,16,17,18,19,20,21,22,23,24,26	47	5	0.46		54		1,3,4,5,6,7,8,9,10,11,13	56	5	0.37		1,3,4,5,6,7,8,9,11,13	49	5	0.45		1,3,4,5,6,7,8,9,10,11,13	37	6	0.41		47.3333
	Q9WU78	Programmed cell death 6-interacting protein	Pdcd6ip	96.0kDa	22,23	34	19	0.2	1.59	22,23	32	22	0.28	1.48	33	1.535	9,10	33	23	0.25	1.55	9	29	23	0.28	1.45	9,10	34	22	0.28	1.52	32	1.50667
	P09055	Integrin beta-1	Itgb1	88.2kDa	23,24	40	15	0.22	1.55	23,24	26	13	0.21	1.11	33	1.33	1,4,6,7,8,9,10	73	14	0.2	2.96	1,4,6,7,8,9,10	70	12	0.19	2.76	1,4,6,7,8,9,10,11	61	13	0.21	2.53	68	2.75
	P07356	Annexin A2	Anxa2	38.7kDa	16,17,25	40	17	0.44	6.46	16,17	24	14	0.4	4.02	32	5.24	4	22	15	0.49	4.6	3,4	22	17	0.49	4.34	4	17	14	0.43	3.04	20.3333	3.99333
	P43406	Integrin alpha-V	Itgav	115.3kDa	14,24	36	22	0.25	1.36	24	26	20	0.23	1.06	31	1.21	1,8	6	6	0.091	0.18	8	3	4	0.057	0.09	8	7	7	0.088	0.22	5.33333	0.163333
	Q62283	Tetraspanin-7	Tspan7	27.5kDa	16,17,19,21,22,24,25	36	4	0.16	3.7	16,17,21	17	4	0.13	1.58	26.5	2.64	4,11	6	3	0.14	0.66	3,11	6	2	0.1	0.66	4	6	4	0.16	0.98	6	0.766667
	Q8BK63	Casein kinase I isoform alpha	Csnk1a1	38.9kDa	16,17,25	27	10	0.32	2.94	16,17	17	11	0.34	2	22	2.47	4	17	11	0.32	2.99	3,4	15	8	0.28	1.43	4	13	10	0.33	1.88	15	2.1
	P17742	Peptidyl-prolyl cis-trans isomerase A	Ppia	18.0kDa	14,20	25	6	0.29		14,20	18	6	0.29		21.5		1	16	6	0.25		1	16	6	0.29		1	16	6	0.25		16
	Q62470	Integrin alpha-3	Itga3	116.7kDa	16,23,24	25	8	0.097	0.63	16,23,24	16	6	0.059	0.49	20.5	0.56	1,3,8,10	30	6	0.059	0.54	3,8,10	31	9	0.12	0.58	3,8,10	18	8	0.11	0.55	26.3333	0.556667
	P63017	Heat shock cognate 71 kDa protein	Hspa8	70.9kDa	20,21	15	12	0.24	0.84	20,21	20	12	0.23	1.14	17.5	0.99	6,7,8	64	24	0.46	6.73	6,7,8	62	24	0.46	5.75	6,7,8	52	24	0.45	6.15	59.3333	6.21
	Q08857	Platelet glycoprotein 4	Cd36	52.7kDa	21,22	16	7	0.1	1.25	21,22	13	5	0.074	0.97	14.5	1.11	6,8,9	24	8	0.1	1.92	6,8,9	19	9	0.12	1.42	4,6,8,9	24	6	0.091	1.73	22.3333	1.69
	P58252	Elongation factor 2	Eef2	95.3kDa	22,23	17	16	0.2	0.73	22	11	12	0.15	0.45	14	0.59	9	19	19	0.26	0.9	9	24	20	0.26	1.03	9	23	21	0.31	1.17	22	1.03333
	Q9D8B7	Junctional adhesion molecule C	Jam3	34.8kDa	17,25	17	7	0.16	1.78	17	9	8	0.15	1.26	13	1.52	1	6	2	0.039	0.44	1	2	2	0.039	0.2						2.66667	0.213333
	P68134	Actin, alpha skeletal muscle	Acta1	42.1kDa	17,25	18	8	0.24	1.8	17	8	7	0.21	0.83	13	1.315	4,5	9	6	0.2	0.73	4,5	8	6	0.19	0.62	4	6	6	0.19	0.57	7.66667	0.64
	P12672	43 kDa receptor-associated protein of the synapse	Rapsn	46.4kDa	17,25	17	7	0.18	1.35	17	8	8	0.21	0.73	12.5	1.04	4	10	7	0.18	0.62	4	11	8	0.21	0.86	4	9	9	0.26	0.86	10	0.78
	P11688	Integrin alpha-5	Itga5	115.1kDa	24	11	9	0.1	0.29	14,24	13	10	0.11	0.34	12	0.315	1,8,9	12	7	0.057	0.26	1,8,9	17	7	0.073	0.42	8,9	6	6	0.035	0.14	11.6667	0.273333
	Q8VDN2	Sodium/potassium-transporting ATPase subunit alpha-1	Atp1a1	113.0kDa	23,24	11	8	0.081	0.34	23,24	12	8	0.09	0.38	11.5	0.36	9,10,11	18	11	0.11	0.56	9,10,11	15	7	0.081	0.46	9,10,11	12	8	0.09	0.36	15	0.46
	Q8C863	E3 ubiquitin-protein ligase Itchy	Itch	99.0kDa	23	10	10	0.15	0.38	23	11	10	0.15	0.43	10.5	0.405	10	9	9	0.12	0.34	10	11	11	0.16	0.43	10	14	13	0.22	0.57	11.3333	0.446667
	Q05512	Serine/threonine-protein kinase MARK2	Mark2	86.3kDa	21,22	11	9	0.13		21,22	10	8	0.11		10.5		8,9	24	16	0.25		8,9	24	13	0.21		8,9	17	12	0.17	0.76	21.6667
	P10107	Annexin A1	Anxa1	38.7kDa	17,25	14	6	0.22	1.27	16,17	5	3	0.1	0.46	9.5	0.865	4	7	6	0.22	0.63	4	7	6	0.22	0.77	4	7	7	0.22	0.77	7	0.723333
	P51150	Ras-related protein Rab-7a	Rab7a	23.5kDa	14	10	8	0.43	2.78	14	8	7	0.4	1.54	9	2.16	1	7	7	0.38	1.54	1	5	5	0.3	0.94	1	8	6	0.33	1.54	6.66667	1.34
	Q6PIC6	Sodium/potassium-transporting ATPase subunit alpha-3	Atp1a3	111.7kDa	23,24	8	5	0.064	0.24	22,23,24	10	5	0.064	0.3	9	0.27	9,10,11	13	4	0.046	0.4	9,10,11	12	5	0.064	0.37	9,10,11	9	4	0.046	0.27	11.3333	0.346667
	P15379	CD44 antigen	Cd44	85.6kDa	21,22	9	3	0.082	0.85	21,22	8	2	0.052	0.75	8.5	0.8						1	4	2	0.058	0.37	1	5	2	0.058	0.48	3	0.283333
	P48036	Annexin A5	Anxa5	35.8kDa	16	8	7	0.25	1.03	16	8	6	0.2	1.03	8	1.03	3	4	4	0.15	0.42	3	5	4	0.13	0.55	3	3	2	0.053	0.3	4	0.423333
	Q62419	Endophilin-A2	Sh3gl1	41.5kDa	19	8	6	0.16	0.58	19	8	7	0.18	0.71	8	0.645	6	2	2	0.065	0.16	6	3	3	0.065	0.26	6	3	3	0.065	0.26	2.66667	0.226667
	P26041	Moesin	Msn	67.8kDa	21	9	6	0.1	0.53	21	7	7	0.12	0.39	8	0.46	8	20	16	0.28	1.45	8	16	12	0.2	0.85	8	15	11	0.21	1.03	17	1.11
	Q91ZR2	Sorting nexin-18	Snx18	67.9kDa	21	8	7	0.12	0.46	21	8	8	0.17	0.46	8	0.46	8	14	9	0.18	0.93	8	12	9	0.15	0.76	8	7	7	0.15	0.39	11	0.693333
	Q78PY7	Staphylococcal nuclease domain-containing protein 1	Snd1	102.1kDa	23	9	8	0.11	0.33	23	7	7	0.091	0.25	8	0.29	10	10	9	0.12	0.37	10	9	8	0.11	0.33	10	10	9	0.12	0.37	9.66667	0.356667
	Q8BSL7	ADP-ribosylation factor 2	Arf2	20.7kDa	14	5	6	0.44	1.11	14	9	7	0.45	2.83	7	1.97	1	9	7	0.52	2.83	1	6	5	0.31	1.45	1	10	8	0.48	2.83	8.33333	2.37
	P62835	Ras-related protein Rap-1A	Rap1a	21.0kDa	14	8	4	0.29	1.09	14	6	5	0.34	1.43	7	1.26	1	5	4	0.26	1.09	1	5	4	0.26	0.81	1	7	6	0.47	1.81	5.66667	1.23667
	Q8K1A6	Coiled-coil and C2 domain-containing protein 1A	Cc2d1a	103.7kDa	24	7	7	0.1	0.24	24	7	6	0.08	0.24	7	0.24	10	7	6	0.088	0.24	10	9	9	0.12	0.32	10	9	9	0.12	0.32	8.33333	0.293333
	P61027	Ras-related protein Rab-10	Rab10	22.5kDa	14	7	6	0.31	1.63	14	6	6	0.28	1.29	6.5	1.46	1	10	7	0.35	2.02	1	8	6	0.41	2.02	1	5	5	0.32	0.99	7.66667	1.67667
	O35566	CD151 antigen	Cd151	28.2kDa	14,17,19,25	11	3	0.075	1.45	14	2	2	0.071	0.25	6.5	0.85											7	2	2	0.071	0.25	0.666667	0.0833333
	Q61187	Tumor susceptibility gene 101 protein	Tsg101	44.1kDa	19	8	7	0.2	0.65	19	5	5	0.16	0.43	6.5	0.54	6	5	5	0.14	0.43	6	9	9	0.28	0.91	6	10	9	0.25	1.05	8	0.796667
	Q8K2A1	PTB domain-containing engulfment adapter protein 1	Gulp1	34.5kDa	17,25	10	4	0.14	0.74	17	3	4	0.1	0.31	6.5	0.525	4	5	4	0.1	0.43	4	6	5	0.14	0.56	4	4	5	0.14	0.43	5	0.473333
	Q9DC28	Casein kinase I isoform delta	Csnk1d	47.3kDa	19	7	7	0.23	0.57	19	6	6	0.18	0.47	6.5	0.52	6	10	8	0.21	0.91	6	11	7	0.18	0.91	6	8	6	0.17	0.68	9.66667	0.833333
	Q61598	Rab GDP dissociation inhibitor beta	Gdi2	50.5kDa	19	7	6	0.18	0.55	19	6	5	0.14	0.46	6.5	0.505	6	6	6	0.2	0.46	6	4	4	0.12	0.29	6	4	4	0.1	0.29	4.66667	0.346667
	Q99JB8	Protein kinase C and casein kinase II substrate protein 3	Pacsin3	48.6kDa	19	7	6	0.11	0.58	19	6	5	0.14	0.39	6.5	0.485	6	9	9	0.21	0.8	6	5	5	0.13	0.39	6	8	7	0.19	0.69	7.33333	0.626667
	Q9JLM8	Serine/threonine-protein kinase DCLK1	Dclk1	84.2kDa	17,25	9	6	0.12	0.56	17	4	4	0.1	0.24	6.5	0.4	4	5	5	0.12	0.31	4	4	4	0.099	0.24	4	3	3	0.074	0.18	4	0.243333
	P60766	Cell division control protein 42 homolog	Cdc42	21.3kDa	14	6	2	0.16	1.41	14	6	3	0.21	1.41	6	1.41	1	3	2	0.16	0.55	1	2	2	0.16	0.34	1	3	2	0.16	0.55	2.66667	0.48
	P63001	Ras-related C3 botulinum toxin substrate 1	Rac1	21.5kDa	14	5	4	0.19	0.94	14	7	5	0.25	1.54	6	1.24	1	7	5	0.25	1.54	1	6	5	0.25	1.22	1	6	5	0.25	1.22	6.33333	1.32667
	Q6PHN9	Ras-related protein Rab-35	Rab35	23.0kDa	14	5	3	0.16	0.72	14	7	6	0.38	1.58	6	1.15	1	7	4	0.21	0.72	1	3	3	0.16	0.5	1	3	2	0.09	0.5	4.33333	0.573333
	Q6ZWR6	Nesprin-1	Syne1	1009.9kDa	19,21,27	6	4	0.007	0.02	14,21,27	6	3	0.007	0.02	6	0.02	1,6	4	3	0.005	0.01											1.33333	0.00333333
	P61226	Ras-related protein Rap-2b	Rap2b	20.5kDa	14	6	6	0.4	1.47	14	5	4	0.32	1.13	5.5	1.3	1	3	3	0.34	0.57	1	3	3	0.26	0.57	1	2	2	0.11	0.35	2.66667	0.496667
	P62071	Ras-related protein R-Ras2	Rras2	23.4kDa	14	5	3	0.17	0.7	14	6	5	0.27	0.94	5.5	0.82	1	3	3	0.19	0.49	1	6	4	0.23	0.7	1	5	4	0.21	0.94	4.66667	0.71
	P60710	Actin, cytoplasmic 1	Actb	41.7kDa	17,25	7	5	0.24	0.61	17	4	4	0.17	0.35	5.5	0.48						4	4	4	0.17	0.35						1.33333	0.116667
	O54901	OX-2 membrane glycoprotein	Cd200	31.3kDa	19	6	3	0.076	0.5	19	5	2	0.072	0.35	5.5	0.425	6	4	3	0.076	0.5	6	4	3	0.076	0.5	6	4	2	0.072	0.35	4	0.45
	Q91VH2	Sorting nexin-9	Snx9	66.5kDa	21	5	5	0.091	0.27	21	6	6	0.11	0.33	5.5	0.3	8	13	11	0.21	0.87	8	9	8	0.15	0.54	8	7	7	0.12	0.4	9.66667	0.603333
	P26231	Catenin alpha-1	Ctnna1	100.1kDa	23	5	5	0.094	0.17	23	6	6	0.12	0.21	5.5	0.19	9,10	12	7	0.12	0.43	9,10	9	6	0.1	0.31	9,10	9	7	0.12	0.31	10	0.35
	Q61072	Disintegrin and metalloproteinase domain-containing protein 9	Adam9	92.0kDa	21	4	3	0.04	0.15	21	7	5	0.075		5.5		8	2	2	0.028	0.07	8	3	3	0.04	0.11						1.66667
	P63242	Eukaryotic translation initiation factor 5A-1	Eif5a	16.8kDa	14	4	4	0.36	1.09	14	6	5	0.36	1.51	5	1.3	1	2	2	0.13	0.45	1	4	2	0.13	0.45	1	4	3	0.29	1.09	3.33333	0.663333
	P46638	Ras-related protein Rab-11B	Rab11b	24.5kDa	14	3	3	0.15	0.47	14	7	7	0.38	1.46	5	0.965	1	6	5	0.24	1.16	1	4	3	0.14	0.47	1	5	4	0.19	0.9	5	0.843333
	Q9D8B3	Charged multivesicular body protein 4b	Chmp4b	24.9kDa	16	2	2	0.094		16	8	5	0.27	1.72	5	0.86	3,4	9	6	0.27	1.4	3,4	10	5	0.2	1.68	4	5	4	0.2	0.87	8	1.31667
	Q62159	Rho-related GTP-binding protein RhoC	Rhoc	22.0kDa	14	3	3	0.16	0.53	14	7	2	0.13	1.03	5	0.78	1	5	3	0.25	0.76	1	7	2	0.13	0.76						4	0.506667
	Q8CIB5	Fermitin family homolog 2	Fermt2	77.8kDa	21	3	3	0.04	0.13	21	7	7	0.13	0.33	5	0.23	8	12	10	0.21	0.64	8	10	10	0.23	0.51	8	13	13	0.25	0.71	11.6667	0.62
	P97321	Seprase	Fap	87.9kDa	22,23	7	5	0.072	0.27	23	3	3	0.047	0.12	5	0.195	9	5	5	0.058	0.2	9	5	5	0.058	0.2	9	5	5	0.062	0.2	5	0.2
	Q9DBG3	AP-2 complex subunit beta	Ap2b1	104.6kDa	23	5	5	0.055	0.17	23	5	5	0.086	0.17	5	0.17	9,10	9	7	0.099	0.3	10	3	3	0.043	0.1	10	5	5	0.073	0.17	5.66667	0.19
	P08752	Guanine nucleotide-binding protein G(i) subunit alpha-2	Gnai2	40.5kDa	17,25	7	4	0.14	0.63	17	2	2	0.082	0.17	4.5	0.4	4	4	4	0.14	0.37	4	3	2	0.065	0.17	4	4	3	0.1	0.37	3.66667	0.303333
	P09411	Phosphoglycerate kinase 1	Pgk1	44.6kDa	17,25	7	4	0.13	0.57	17	2	2	0.079	0.15	4.5	0.36	4	2	2	0.055	0.15											0.666667	0.05
	P62631	Elongation factor 1-alpha 2	Eef1a2	50.5kDa	19	5	4	0.095	0.37	19	4	4	0.095	0.29	4.5	0.33	6	3	3	0.063	0.21	6	3	3	0.063	0.21	6	5	5	0.11	0.37	3.66667	0.263333
	P62962	Profilin-1	Pfn1	15.0kDa	14	4	3	0.32	1.28	14	4	3	0.32	1.28	4	1.28	1	3	3	0.26	0.86	1	2	2	0.17	0.51	1	3	3	0.32	0.86	2.66667	0.743333
	Q9WVA4	Transgelin-2	Tagln2	22.4kDa	14	3	2	0.15	0.47	14	5	5	0.29	0.9	4	0.685	1	4	3	0.14	0.47	1	7	4	0.2	0.67	1	5	4	0.2	0.67	5.33333	0.603333
	P16056	Hepatocyte growth factor receptor	Met	153.5kDa	24	5	5	0.038	0.11	24	3	3	0.022	0.06	4	0.085	6	4	4	0.033	0.09	6,7	7	6	0.035	0.15	6	2	2	0.015	0.04	4.33333	0.0933333
	O08992	Syntenin-1	Sdcbp	32.4kDa	16	3	3	0.09	0.34	16	4	3	0.09	0.47	3.5	0.405	3,4	4	2	0.07	0.43	3	5	4	0.11	0.63	3,4	7	4	0.11	0.81	5.33333	0.623333
	Q8K2Q7	BRO1 domain-containing protein BROX	Brox	46.2kDa	17,25	5	2	0.046	0.29	17	2	2	0.046	0.15	3.5	0.22	4	2	2	0.046	0.15	4	2	2	0.046	0.15						1.33333	0.1
	Q9DBV4	Matrix-remodeling-associated protein 8	Mxra8	49.8kDa	19	5	4	0.084	0.29	19	2	2	0.043	0.14	3.5	0.215						1	3	2	0.045	0.21						1	0.07
	P16381	Putative ATP-dependent RNA helicase Pl10	D1Pas1	73.1kDa	21	2	2	0.041	0.09	21	5	5	0.071	0.24	3.5	0.165	8	8	6	0.098	0.42	8	8	13	0.0042		8	7	7	0.12	0.36	7.66667	0.26
	P17426	AP-2 complex subunit alpha-1	Ap2a1	107.7kDa	23	4	2	0.021	0.09	23	3	3	0.042	0.09	3.5	0.09						10	3	3	0.033	0.09	10	2	2	0.031	0.06	1.66667	0.05
	P63024	Vesicle-associated membrane protein 3	Vamp3	11.5kDa	14	2	2	0.32	0.69	14	4	2	0.32	1.85	3	1.27	1	3	2	0.32	1.2	1	2	2	0.32	0.69	1	3	2	0.32	1.2	2.66667	1.03
	P62331	ADP-ribosylation factor 6	Arf6	20.1kDa	14	4	4	0.3	0.86	14	2	2	0.13	0.36	3	0.61	1	2	2	0.15	0.36	1	3	3	0.21	0.59						1.66667	0.316667
	Q9Z0G9	Claudin-3	Cldn3	23.3kDa	14	3	3	0.19	0.49	14	3	3	0.19	0.49	3	0.49	1	3	2	0.14	0.49	1	3	3	0.19	0.49	1	4	3	0.19	0.71	3.33333	0.563333
	P10833	Ras-related protein R-Ras	Rras	23.8kDa	14	3	3	0.14	0.48	14	3	3	0.19	0.48	3	0.48	1	2	2	0.12	0.3	1	2	2	0.12	0.3	1	2	2	0.12	0.3	2	0.3
	P70452	Syntaxin-4	Stx4	34.2kDa	16	2	2	0.074	0.2	16	4	4	0.17	0.45	3	0.325	3	4	4	0.23	0.45	3,4	8	5	0.27	0.9	3	3	3	0.13	0.32	5	0.556667
	P97429	Annexin A4	Anxa4	36.0kDa	16	3	3	0.11	0.3	16	3	3	0.12	0.3	3	0.3	3	2	2	0.069	0.19	3	4	5	0.15	0.42						2	0.203333
	Q61011	Guanine nucleotide-binding protein G(I)/G(S)/G(T) subunit beta-3	Gnb3	32.7kDa						16	6	2	0.05	0.29	3	0.145	3	3	2	0.05	0.19	3	4	2	0.05	0.29						2.33333	0.16
	P70206	Plexin-A1	Plxna1	211.1kDa	26	3	3	0.021	0.05	26	3	3	0.014	0.05	3	0.05	7	7	7	0.041	0.11	7	7	7	0.041	0.11	7	6	6	0.034	0.1	6.66667	0.106667
	B2RXS4	Plexin B2	Plxnb2	206.2kDa	21	3	3	0.015	0.05	21	3	3	0.021	0.05	3	0.05	8	8	8	0.04	0.13	8	9	8	0.04	0.13	8	3	3	0.017	0.05	6.66667	0.103333
	P61021	Ras-related protein Rab-5B	Rab5b	23.7kDa	14	3	3	0.17	0.48	14	2	2	0.1	0.3	2.5	0.39	1	2	2	0.1	0.3	1	3	3	0.17	0.48	1	2	2	0.098	0.3	2.33333	0.36
	P58242	Acid sphingomyelinase-like phosphodiesterase 3b	Smpdl3b	51.6kDa						21	5	3	0.1	0.28	2.5	0.14	8,9	8	4	0.1	0.56	8	7	2	0.075	0.45	8	4	2	0.075	0.2	6.33333	0.403333
	P57716	Nicastrin	Ncstn	78.5kDa	24	2	2	0.038	0.08	24	3	3	0.054	0.13	2.5	0.105	11	3	3	0.054	0.13	11	3	3	0.054	0.13	11	3	3	0.054	0.13	3	0.13
	P11531	Dystrophin	Dmd	425.8kDa	17,25	5	3	0.012	0.03						2.5	0.015	6,7,9,13	8	2	0.012	0.06	4	2	2	0.012	0.02						3.33333	0.0266667
	Q9CQ10	Charged multivesicular body protein 3	Chmp3	25.2kDa	16	2	2	0.081	2.8	16	2	2	0.094	0.28	2	1.54	3	2	2	0.094	0.28	3	3	3	0.13	0.45	3	3	3	0.11	0.45	2.66667	0.393333
	P62821	Ras-related protein Rab-1A	Rab1a	22.7kDa	14	2	2	0.17	0.74	14	2	2	0.12	0.74	2	0.74						1	3	2	0.11	0.51						1	0.17
	P45591	Cofilin-2	Cfl2	18.7kDa	14	2	2	0.17	0.39	14	2	2	0.17	0.39	2	0.39	1	2	2	0.17	0.39	1	3	3	0.19	0.64	1	2	2	0.17	0.39	2.33333	0.473333
	Q62465	Synaptic vesicle membrane protein VAT-1 homolog	Vat1	43.1kDa	19	2	2	0.057	0.16	19	2	2	0.071	0.16	2	0.16	6	2	2	0.059	0.16											0.666667	0.0533333
	P10126	Elongation factor 1-alpha 1	Eef1a1	50.1kDa	19	2	2	0.078	0.13	19	2	2	0.078	0.13	2	0.13	6	3	2	0.039	0.21	6	2	2	0.078	0.13	6	3	3	0.091	0.21	2.66667	0.183333
	Q61696	Heat shock 70 kDa protein 1A	Hspa1a	70.1kDa	20	2	2	0.037	0.1	20	2	2	0.037	0.1	2	0.1	8	4	4	0.1	0.2	8	3	3	0.075	0.15	7,8	6	4	0.075	0.29	4.33333	0.213333
	Q8BVD6	X-prolyl aminopeptidase (Aminopeptidase P) 2, membrane-bound	Xpnpep2	76.4kDa	22	2	2	0.03	0.09	22	2	2	0.027	0.09	2	0.09	9	3	3	0.037	0.14	9	4	4	0.046	0.18	9	3	3	0.045	0.14	3.33333	0.153333
	Q64727	Vinculin	Vcl	116.7kDa	24	2	2	0.02	0.06	24	2	2	0.02	0.06	2	0.06						10	2	2	0.02	0.06						0.666667	0.02
	P10639	Thioredoxin	Txn	11.7kDa						14	3	2	0.21	1.18	1.5	0.59											1	2	2	0.21	0.68	0.666667	0.226667
	P61750	ADP-ribosylation factor 4	Arf4	20.4kDa						14	3	3	0.19	0.58	1.5	0.29											1	3	3	0.19	0.58	1	0.193333
	P84096	Rho-related GTP-binding protein RhoG	Rhog	21.3kDa						14	3	3	0.15	0.55	1.5	0.275	1	3	3	0.19	0.55	1	3	3	0.094	0.55	1	2	2	0.094	0.34	2.66667	0.48
	P84091	AP-2 complex subunit mu	Ap2m1	49.7kDa	19	3	3	0.064	0.21						1.5	0.105	6	3	3	0.064	0.21	6	4	4	0.087	0.29	6	4	4	0.08	0.29	3.66667	0.263333
	Q8CIP4	MAP/microtubule affinity-regulating kinase 4	Mark4	82.6kDa	22	3	3	0.043	0.12						1.5	0.06	9	3	3	0.06	0.12	9	4	4	0.074	0.17	9	4	4	0.073	0.17	3.66667	0.153333
	P50543	Protein S100-A11	S100a11	11.1kDa						14	2	2	0.23	0.71	1	0.355						1	2	2	0.23	0.71						0.666667	0.236667
	P26883	Peptidyl-prolyl cis-trans isomerase FKBP1A	Fkbp1a	11.9kDa						14	2	2	0.25	0.67	1	0.335	1	2	2	0.25	0.67	1	2	2	0.25	0.67	1	3	2	0.25	1.15	2.33333	0.83
	Q9D868	Peptidyl-prolyl cis-trans isomerase H	Ppih	20.5kDa						14	2	2	0.064	0.35	1	0.175	1	2	2	0.064	0.35	1	2	2	0.064	0.35	1	3	2	0.064	0.58	2.33333	0.426667
	Q921W0	Charged multivesicular body protein 1a	Chmp1a	21.6kDa						15	2	2	0.092	0.33	1	0.165						2	2	2	0.092	0.33						0.666667	0.11
	Q9JIW9	Ras-related protein Ral-B	Ralb	23.3kDa						14	2	2	0.087	0.31	1	0.155	1	2	2	0.087	0.31						1	4	3	0.17	0.71	2	0.34
	Q01730	Ras supressor protein 1	Rsu1	31.6kDa	15	2	2	0.18	0.22						1	0.11	2	2	2	0.18	0.22											0.666667	0.0733333
	P18828	Syndecan-1	Sdc1	32.9kDa						26	2	2	0.042	0.21	1	0.105	1	2	2	0.042	0.21	1	2	2	0.042	0.21	1	3	2	0.042	0.33	2.33333	0.25
	Q9WV02	RNA-binding motif protein, X chromosome	Rbmx	42.3kDa	19	2	2	0.066	0.16						1	0.08	6	2	2	0.066	0.16											0.666667	0.0533333
	P46467	Vacuolar protein sorting-associated protein 4B	Vsp4b	49.4kDa						19	2	2	0.063	0.14	1	0.07	6	5	5	0.11	0.38	6	4	4	0.11	0.29	6	2	2	0.056	0.14	3.66667	0.27
	Q8VIJ6	Splicing factor, proline- and glutamine-rich	Sfpq	75.4kDa						23	2	2	0.037	0.09	1	0.045	9	4	5	0.069	0.18	9	4	4	0.069	0.18	9	3	3	0.053	0.14	3.66667	0.166667
	Q8VHK9	Probable ATP-dependent RNA helicase DHX36	Dhx36	113.9kDa						23	2	2	0.035	0.06	1	0.03	10	3	3	0.038	0.09	10	2	2	0.027	0.06	10	3	3	0.033	0.09	2.66667	0.08
	Q9WTI7	Unconventional myosin-Ic	Myo1c	121.9kDa						23	2	2	0.02	0.06	1		10	7	6	0.071	0.2	10	12	12	0.12		10	6	5	0.052	0.2	8.33333
Identified Only in Whole Virions	Q91ZX7	Prolow-density lipoprotein receptor-related protein 1	Lrp1	504.7kDa	21,22,23,24,26,27	257	87	0.21	1.75	21,22,23,24,26,27	229	88	0.22	1.66	243	1.705
	Q8VHY0	Chondroitin sulfate proteoglycan 4	Cspg4	252.4kDa	24,26,27	73	35	0.14	1.16	26,27	69	34	0.15	1.05	71	1.105
	O08532	Voltage-dependent calcium channel subunit alpha-2/delta-1	Cacna2d1	124.6kDa	14,24	43	32	0.33		24	33	25	0.26		38
	Q9WV91	Prostaglandin F2 receptor negative regulator	Ptgfrn	98.7kDa	23,24	41	21	0.23	1.54	24	25	19	0.2	1.13	33	1.335
	Q8R366	Immunoglobulin superfamily member 8	Igsf8	65.0kDa	19,21,22	30	9	0.16	1.41	19,21,22	23	10	0.17	1.31	26.5	1.36
	P11276	Fibronectin	Fn1	272.5kDa	26,27	23	17	0.094	0.29	26,27	27	19	0.097	0.35	25	0.32
	Q8VI56	Low-density lipoprotein receptor-related protein 4	Lrp4	212.0kDa	26	22	22	0.15	0.4	26	22	21	0.15	0.4	22	0.4
	Q9QUR8	Semaphorin-7A	Sema7a	75.0kDa	21	13	9	0.14	0.6	21,22	17	13	0.2	0.99	15	0.795
	Q9WTR5	Cadherin-13	Cdh13	78.3kDa	23,24	12	8	0.12	0.56	22,23,24	18	9	0.16	0.88	15	0.72
	O70309	Integrin beta-5	Itgb5	87.9kDa	22,23	11	8	0.097	0.44	22,23	19	10	0.15		15
	Q9CXI3	DBH-like monooxygenase protein 1	Moxd1	69.7kDa	21,22	13	5	0.067	0.5	21,22	13	6	0.067	0.69	13	0.595
	Q5FWI3	Transmembrane protein 2	Tmem2	153.8kDa	24	6	7	0.049	0.13	24,25	16	10	0.085	0.37	11	0.25
	Q62351	Transferrin receptor protein 1	Tfrc	85.7kDa	22,23	5	6	0.066	0.2	22,23,25	10	6	0.077	0.4	7.5	0.3
	Q03145	Ephrin type-A receptor 2	Epha2	108.8kDa	24	8	7	0.092	0.27	24	6	6	0.08	0.19	7	0.23
	P10852	4F2 cell-surface antigen heavy chain	Slc3a2	58.3kDa	21,22	6	4	0.086	0.36	21,22	6	3	0.07	3.5	6	1.93
	Q8BLU0	Fibronectin leucine rich transmembrane protein 2	Flrt2	73.9kDa	22	7	7	0.13	0.35	22	5	5	0.12	0.24	6	0.295
	Q01721	Growth arrest-specific protein 1	Gas1	35.7kDa	16,17,25	7	3	0.14	0.85	17	4	3	0.14	0.53	5.5	0.69
	Q61490	CD166 antigen	Alcam	65.1kDa	23	5	5	0.082	0.28	23	5	5	0.084	0.28	5	0.28
	O35375	Neuropilin-2	Nrp2	104.6kDa	24	7	7	0.084	0.24	24	3	3	0.042	0.1	5	0.17
	P22752	Histone H2A type 1	Multiple	14.1kDa	14	5	2	0.21	1.87	14	4	3	0.26	1.33	4.5	1.6
	P30412	Peptidyl-prolyl cis-trans isomerase C	Ppic	22.8kDa	14	4	4	0.25	0.73	14	5	4	0.25	0.98	4.5	0.855
	P62806	Histone H4	Multiple	11.4kDa	14	3	3	0.24	1.21	14	5	4	0.36	2.75	4	1.98
	O54890	Integrin beta-3	Itgb3	86.7kDa	22	3	3	0.038	0.12	22	3	3	0.043	0.12	3	0.12
	P35951	Low-density lipoprotein receptor	Ldlr	95.1kDa	24	3	2	0.03	0.07	24	3	3	0.045	0.11	3	0.09
	Q6PHS9	Voltage-dependent calcium channel subunit alpha-2/delta-2	Cacna2d2	130.4kDa	24	3	3	0.042	0.08	24	3	3	0.022	0.08	3	0.08
	P10853	Histone H2B type 1-F/J/L	Multiple	13.9kDa	14	2	2	0.19	0.55	14	3	3	0.2	0.94	2.5	0.745
	P84228	Histone H3.2	Multiple	15.4kDa	14	2	2	0.1	0.49	14	3	2	0.12	0.49	2.5	0.49
	P82347	Delta-sarcoglycan	Sgcd	32.1kDa	16	3	3	0.11	0.34	16	2	2	0.087	0.22	2.5	0.28
	P62874	Guanine nucleotide-binding protein G(I)/G(S)/G(T) subunit beta-1	Gnb1	37.4kDa	16	2	2	0.065	0.19	16	3	3	0.094	0.29	2.5	0.24
	Q80V26	Inositol monophosphatase 3	Impad1	38.6kDa	17,25	5	4	0.084	0.46						2.5	0.23
	P10810	Monocyte differentiation antigen CD14	Cd14	39.2kDa	19	3	2	0.044	0.27	19	2	2	0.044	0.18	2.5	0.225
	Q6DFX2	Anthrax toxin receptor 2	Antxr2	53.2kDa	19	3	3	0.1	0.2	19	2	2	0.057	0.13	2.5	0.165
	Q61738	Integrin alpha-7	Itga7	129.4kDa	20	3	3	0.029	0.08	20	2	2	0.021	0.05	2.5	0.065
	Q61543	Golgi apparatus protein 1	Glg1	133.7kDa	24	3	3	0.034	0.07	24	2	2	0.017	0.05	2.5	0.06
	P43407	Syndecan-2	Sdc2	22.1kDa	26	4	4	0.094	0.76						2	0.38
	Q8BU31	Ras-related protein Rap-2c	Rap2c	20.7kDa	14	2	2	0.11	0.35	14	2	2	0.11	0.35	2	0.35
	P35282	Ras-related protein Rab-21	Rab21	24.1kDa	14	4	3	0.16	0.68						2	0.34
	Q91VU0	Protein FAM3C	Fam3c	24.8kDa	14	2	2	0.11	0.29	14	2	2	0.11	0.29	2	0.29
	P04925	Major prion protein	Prnp	28.0kDa						16	4	4	0.15	0.57	2	0.285
	Q91XX1	Protocadherin gamma C3	Pcdhgc3	101.0kDa	24	2	2	0.034	0.07	24	2	2	0.025	0.07	2	0.07
	Q9QUM0	Integrin alpha-IIb	Itga2b	112.7kDa	24	2	2	0.026	0.06	24	2	2	0.026	0.06	2	0.06
	Q61147	Ceruloplasmin	Cp	121.2kDa	24	2	3	0.023	0.05	24	2	2	0.037	0.05	2	0.05
	F2Z4A3	Protein Fat1	Fat1	506.3kDa	27	2	2	0.007	0.01	27	2	2	0.007	0.01	2	0.01
	Q99MQ4	Asporin	Aspn	42.6kDa	25	3	2	0.083	0.25						1.5	0.125
	Q80X72	Leucine-rich repeat-containing protein 15	Lrrc15	64.2kDa						22	3	3	0.052	0.16	1.5	0.08
	P12023	Amyloid beta A4 protein	App	86.7kDa						24	3	3	0.049	0.12	1.5	0.06
	Q3UHK6	Teneurin-4	Odz4	308.4kDa						26	3	3	0.012	0.03	1.5	0.015
	P48024	Eukaryotic translation initiation factor 1	Eif1	12.7kDa						14	2	2	0.13	0.61	1	0.305
	P84078	ADP-ribosylation factor 1	Arf1	20.7kDa						14	2	2	0.1	0.35	1	0.175
	O35988	Syndecan-4	Sdc4	21.5kDa	24	2	2	0.096	0.34						1	0.17
	P35278	Ras-related protein Rab-5C	Rab5c	23.4kDa	14	2	2	0.15	0.3						1	0.15
	Q60631	Growth factor receptor-bound protein 2	Grb2	25.2kDa						14	2	2	0.097	0.28	1	0.14
	P63101	14-3-3 protein zeta/delta	Ywhaz	27.8kDa	15	2	2	0.13	0.25						1	0.125
	P18572	Basigin	Bsg	42.4kDa	19	2	2	0.066	0.24						1	0.12
	Q8QZY6	Tetraspanin-14	Tspan14	30.7kDa	14	2	2	0.1	0.23						1	0.115
	Q9ER00	Syntaxin-12	Stx12	31.2kDa	16	2	2	0.12	0.22						1	0.11
	P60335	Poly(rC)-binding protein 1	Pcbp1	37.5kDa	25	2	2	0.09	0.18						1	0.09
	O35609	Secretory carrier-associated membrane protein 3	Scamp3	38.4kDa	17	2	2	0.069	0.18						1	0.09
	P82350	Alpha-sarcoglycan	Sgca	43.3kDa	19	2	2	0.047	0.16						1	0.08
	P27601	Guanine nucleotide-binding protein subunit alpha-13	Gna13	44.1kDa	25	2	2	0.056	0.15						1	0.075
	Q9Z0L0	Trophoblast glycoprotein	Tpbg	46.4kDa						21	2	2	0.063	0.15	1	0.075
	Q9CWF2	Tubulin beta-2B chain	Tubb2b	50.0kDa	19	2	2	0.045	0.14						1	0.07
	P21956	Lactadherin	Mfge8	51.3kDa						19	2	2	0.045	0.14	1	0.07
	P17182	Alpha-enolase	Eno1	47.1kDa	19	2	2	0.062	0.14						1	0.07
	Q9JLB0	MAGUK p55 subfamily member 6	Mpp6	62.6kDa						21	2	2	0.04	0.11	1	0.055
	Q9JLB9	Poliovirus receptor-related protein 3	Pvrl3	60.6kDa	22	2	2	0.038	0.11						1	0.055
	P11499	Heat shock protein HSP 90-beta	Hsp90ab1	83.3kDa	22	2	2	0.028	0.08						1	0.04
	Q9DBX3	Sushi domain-containing protein 2	Susd2	90.6kDa						15	2	2	0.061	0.07	1	0.035
	Q8K135	Dyslexia-associated protein KIAA0319-like protein	Kiaa0319l	115.3kDa	24	2	2	0.028	0.06						1	0.03
	Q9JIS8	Solute carrier family 12 member 4	Slc12a4	120.6kDa	24	2	2	0.019	0.05						1	0.025
	P11087	Collagen alpha-1(I) chain	Col1a1	138.0kDa	23	2	2	0.025	0.05						1	0.025
	P54763	Ephrin type-B receptor 2	Ephb2	110.8kDa	24	2	2	0.018	0.06						1	0.03
	Q99PJ1	Protocadherin-15	Pcdh15	214.8kDa						23	2	2	0.015	0.03	1	0.015
	Q8VDD5	Myosin-9	Myh9	226.4kDa	19	2	2	0.017	0.03						1	0.015
Identified Only in ProK Treated Virions	P18052	Receptor-type tyrosine-protein phosphatase alpha	Ptpra	93.7kDa													7	16	15	0.36	1.29	7	18	14	0.33	1.54	7	18	14	0.3	1.54	17.3333	1.45667
	P79621	MHC class II transactivator	Ciita	127.5kDa													7	16	16	0.33	0.32	7	18	15	0.33	1.58	7	16	16	0.3	1.32	16.6667	1.07333
	Q9CX00	IST1 homolog	Ist1	39.5kDa													7	12	11	0.25	0.88	7	11	11	0.25	0.79	7	13	10	0.2	0.88	12	0.85
	Q04736	Proto-oncogene tyrosine-protein kinase Yes	Yes1	60.6kDa													7	13	11	0.24	0.87	7	12	11	0.28	0.87	7	9	8	0.19	0.52	11.3333	0.753333
	P54823	Probable ATP-dependent RNA helicase DDX6	Ddx6	54.2kDa													7	9	9	0.22	0.67	7	13	10	0.24	1.1	7	9	9	0.22	0.67	10.3333	0.813333
	P01942	Hemoglobin subunit alpha	Hba	15.1kDa													7	7	6	0.13	0.39	7	7	6	0.12	0.39	7	4	4	0.09	0.21	6	0.33
	Q9D7S9	Charged multivesicular body protein 5	Chmp5	24.6kDa													8	7	5	0.082	0.41	8	5	5	0.1	0.28	8	3	3	0.07	0.16	5	0.283333
	P11103	Poly [ADP-ribose] polymerase 1	Parp1	113.1kDa													1	6	3	0.15	0.93	1	2	2	0.13	0.3	1	4	3	0.15	0.69	4	0.64
	P32883	GTPase KRas	Kras	21.7kDa													7	3	3	0.067	0.17	7	4	4	0.09	0.23	7	5	4	0.073	0.3	4	0.233333
	Q9CZY3	Ubiquitin-conjugating enzyme E2 variant 1	Ube2v1	16.4kDa													7	3	2	0.047	0.15	7	5	5	0.1	0.26	7	4	4	0.073	0.21	4	0.206667
	O09044	Synaptosomal-associated protein 23	Snap23	23.3kDa													7	4	4	0.11	0.26	7	4	3	0.087	0.26	7	3	3	0.089	0.19	3.66667	0.236667
	O08539	Myc box-dependent-interacting protein 1	Bin1	64.5kDa													9	4	4	0.049	0.13	9	3	3	0.032	0.1	9	4	4	0.043	0.13	3.66667	0.12
	O70274	Protein tyrosine phosphatase type IVA 2	Ptp4a2	19.1kDa													4	2	2	0.083	0.18	4	3	3	0.11	0.28	4	5	4	0.14	0.52	3.33333	0.326667
	P68037	Ubiquitin-conjugating enzyme E2 L3	Ube2l3	17.9kDa													11	3	3	0.027	0.07	11	5	4	0.037	0.12	11	2	2	0.024	0.04	3.33333	0.0766667
	Q9DB05	Alpha-soluble NSF attachment protein	Napa	33.2kDa													1	4	2	0.016	0.12	1	3	2	0.016	0.08	1	2	2	0.032	0.08	3	0.0933333
	Q9DB34	Charged multivesicular body protein 2a	Chmp2a	25.1kDa													10	2	2	0.028	0.06	10	4	4	0.041	0.12	10	3	3	0.044	0.09	3	0.09
	Q8BJW6	Eukaryotic translation initiation factor 2A	Eif2a	64.4kDa													4	3	3	0.18	0.32	4	2	2	0.14	0.2	4	3	3	0.11	0.32	2.66667	0.28
	Q07832	Serine/threonine-protein kinase PLK1	Plk1	68.3kDa													9	3	3	0.035	0.12	9	3	3	0.043	0.12	9	2	2	0.04	0.08	2.66667	0.106667
	P21278	Guanine nucleotide-binding protein subunit alpha-11	Gna11	42.0kDa													1	2	2	0.13	0.38	1	2	2	0.13	0.38	1	3	3	0.31	0.62	2.33333	0.46
	P10711	Transcription elongation factor A protein 1	Tcea1	33.9kDa													8	4	4	0.06	0.16						8	3				2.33333	0.0533333
	B2RWW6	GCN1 general control of amino-acid synthesis 1-like 1 (Yeast)	Gcn1l1	293kDa													1	2	2	0.14	0.43	1	2	2	0.14	0.43	1	2	2	0.14	0.43	2	0.43
	P97300	Neuroplastin	Nptn	44.4kDa																		3	3	3	0.1	0.45	3	2	2	0.063	0.28	1.66667	0.243333
	Q9JM52	Misshapen-like kinase 1	Mink1	147.3kDa																		6	2	2	0.036	0.15	6	3	3	0.085	0.23	1.66667	0.126667
	Q62371	Discoidin domain-containing receptor 2	Ddr2	96.5kDa													8	3	2	0.023	0.13	8	2	2	0.032	0.08						1.66667	0.07
	P17183	Gamma-enolase	Eno2	47.3kDa													6	2	2	0.03	0.07						6	3	3	0.032	0.1	1.66667	0.0566667
	Q9WV95	Pleckstrin homology-like domain family A member 3	Phlda3	13.7kDa													3	2	2	0.11	0.29	3	2	2	0.21	0.29						1.33333	0.193333
	Q9WVE8	Protein kinase C and casein kinase substrate in neurons protein 2	Pacsin2	55.8kDa													1	2	2	0.11	0.28						1	2	2	0.11	0.28	1.33333	0.186667
	Q9WVK4	EH domain-containing protein 1	Ehd1	60.6kDa													7	2	2	0.096	0.22	7	2	2	0.096	0.22						1.33333	0.146667
	P97820	Mitogen-activated protein kinase kinase kinase kinase 4	Map4k4	140.6kDa													6	2	2	0.061	0.17	6	2	2	0.061	0.17						1.33333	0.113333
	Q91YR7	Pre-mRNA-processing factor 6	Prpf6	106.7kDa																		7	4	4	0.095	0.22						1.33333	0.0733333
	O89086	Putative RNA-binding protein 3	Rbm3	16.6kDa																		7	2	2	0.03	0.1	7	2	2	0.03	0.1	1.33333	0.0666667
	Q9Z321	DNA topoisomerase 3-beta-1	Top3b	97.0kDa																							1	3	2	0.14	0.76	1	0.253333
	Q9QUJ7	Long-chain-fatty-acid--CoA ligase 4	Acsl4	79.1kDa																							3	3	3	0.082	0.32	1	0.106667
	O35598	Disintegrin and metalloproteinase domain-containing protein 10	Adam10	84.0kDa																							3	3	3	0.11	0.31	1	0.103333
	Q9D1C8	Vacuolar protein sorting-associated protein 28 homolog	Vps28	25.5kDa													4	3	2	0.071	0.29											1	0.0966667
	P31428	Dipeptidase 1	Dpep1	45.7kDa													6	3	3	0.089	0.19											1	0.0633333
	Q9QXY6	EH domain-containing protein 3	Ehd3	60.8kDa													6	3	2	0.098	0.15											1	0.05
	Q9QYJ0	DnaJ homolog subfamily A member 2	Dnaja2	45.7kDa													10	3	4	0.034	0.09											1	0.03
	Q9QYJ3	DnaJ homolog subfamily B member 1	Dnajb1	38.2kDa																		3	3	2	0.029	0.05						1	0.0166667
	P61089	Ubiquitin-conjugating enzyme E2 N	Ube2n	17.1kDa																							1	2	2	0.14	0.55	0.666667	0.183333
	P28352	DNA-(apurinic or apyrimidinic site) lyase	Apex1	35.5kDa																							1	2	2	0.17	0.49	0.666667	0.163333
	Q8BRN9	Coiled-coil and C2 domain-containing protein 1B	Cc2d1b	93.1kDa																		1	2	2	0.17	0.46						0.666667	0.153333
	Q02257	Junction plakoglobin	Jup	81.8kDa																							1	2	2	0.092	0.45	0.666667	0.15
	Q9Z0N1	Eukaryotic translation initiation factor 2 subunit 3, X-linked	Eif2s3x	51.1kDa													1	2	2	0.14	0.44											0.666667	0.146667
	Q922G2	Protein FAM76A	Fam76a	35.1kDa																							1	2	2	0.2	0.41	0.666667	0.136667
	Q5M8N0	CB1 cannabinoid receptor-interacting protein 1	Cnrip1	18.6kDa																		1	2	2	0.24	0.39						0.666667	0.13
	Q7M6Y3	Phosphatidylinositol-binding clathrin assembly protein	Picalm	71.5kDa																		1	2	2	0.12	0.33						0.666667	0.11
	Q9JLQ0	CD2-associated protein	Cd2ap	70.4kDa													1	2	2	0.1	0.29											0.666667	0.0966667
	Q8K021	Secretory carrier-associated membrane protein 1	Scamp1	38.0kDa													1	2	2	0.12	0.29											0.666667	0.0966667
	P17427	AP-2 complex subunit alpha-2	Ap2a2	104.1kDa													3	2	2	0.088	0.21											0.666667	0.07
	P14824	Annexin A6	Anxa6	75.9kDa																		4	2	2	0.082	0.2						0.666667	0.0666667
	Q00993	Tyrosine-protein kinase receptor UFO	Axl	98.3kDa																		3	2	2	0.071	0.18						0.666667	0.06
	Q9EQP2	EH domain-containing protein 4	Ehd4	61.5kDa																		4	2	2	0.062	0.17						0.666667	0.0566667
	Q06138	Calcium-binding protein 39	Cab39	39.8kDa																							4	2	2	0.061	0.16	0.666667	0.0533333
	Q99K48	Non-POU domain-containing octamer-binding protein	Nono	54.5kDa																							7	2	2	0.071	0.15	0.666667	0.05
	P61222	ATP-binding cassette sub-family E member 1	Abce1	67.3kDa																		6	2	2	0.051	0.13						0.666667	0.0433333
	Q8R1F1	Niban-like protein 1	Fam129b	84.8kDa																		7	2	2	0.049	0.12						0.666667	0.04
	P26040	Ezrin	Ezr	69.4kDa																		7	2	2	0.043	0.11						0.666667	0.0366667
	P55258	Ras-related protein Rab-8A	Rab8a	23.7kDa													6	2	2	0.046	0.1											0.666667	0.0333333
	Q9QYI3	DnaJ homolog subfamily C member 7	Dnajc7	56.5kDa																		8	2	2	0.044	0.1						0.666667	0.0333333
	Q9CUN6	E3 ubiquitin-protein ligase SMURF1	Smurf1	83.4kDa																							8	2	2	0.043	0.1	0.666667	0.0333333
	Q4VAA7	Sorting nexin-33	Snx33	65.3kDa																							7	2	2	0.042	0.1	0.666667	0.0333333
	A2A5Z6	E3 ubiquitin-protein ligase SMURF2	Smurf2	86.2kDa																		8	2	2	0.044	0.1						0.666667	0.0333333
	Q9QXS1	Plectin	Plec	534.2kDa																		7	2	2	0.053	0.09						0.666667	0.03
	Q8BH64	EH domain-containing protein 2	Ehd2	61.2kDa																							7	2	2	0.032	0.08	0.666667	0.0266667
	P18760	Cofilin-1	Cfl1	18.6kDa																		8	2	2	0.035	0.08						0.666667	0.0266667
	Q5SYD0	Unconventional myosin-Id	Myo1d	116.1kDa													8	2	2	0.038	0.08											0.666667	0.0266667
	O08599	Syntaxin-binding protein 1	Stxbp1	67.6kDa																							9	2	2	0.039	0.07	0.666667	0.0233333
	Q923Z0	G-protein coupled receptor family C group 5 member B	Gprc5b	45.9kDa													7	2	2	0.02	0.07											0.666667	0.0233333
	Q6NZB0	DnaJ homolog subfamily C member 8	Dnajc8	29.8kDa													9	2	2	0.035	0.07											0.666667	0.0233333
	O35516	Neurogenic locus notch homolog protein 2	Notch2	265.3kDa																		10	2	2	0.019	0.06						0.666667	0.02
	Q9JMG1	Endothelial differentiation-related factor 1	Edf1	16.4kDa																		11	2	2	0.024	0.05						0.666667	0.0166667
	Q922B6	E3 ubiquitin-protein ligase TRAF7	Traf7	66.5kDa													1	2	2	0.026	0.03											0.666667	0.01
	Q9CYL5	Golgi-associated plant pathogenesis-related protein 1	Glipr2	17.1kDa													10	2	2	0.01	0.02											0.666667	0.00666667
	E9Q0T8	Protein Dnahc7a	Dnahc7a	460.9kDa																		13	2	2	0.006	0.01						0.666667	0.00333333
	Q60770	Syntaxin-binding protein 3	Stxbp3	67.9kDa																							6	2	2	0.01	0.01	0.666667	0.00333333
aUniProtKB
bAs indicated in Figure 3

## Sheet: Sheet4
	Accession #a	Gene Namea	Gene Abbreviationa	Molecular Weighta	Whole VSV Virions								ProK Treated VSV Virions
					Technical Replicate 1				Technical Replicate 2				Technical Replicate 1				Technical Replicate 2				Technical Replicate 3
					Slice(s) Identifiedb	Total Spectra	Unique Peptides	% Coverage	Slice(s) Identifiedb	Total Spectra	Unique Peptides	% Coverage	Slice(s) Identifiedb	Total Spectra	Unique Peptides	% Coverage	Slice(s) Identifiedb	Total Spectra	Unique Peptides	% Coverage	Slice(s) Identifiedb	Total Spectra	Unique Peptides	% Coverage	Whole	ProK
Identified in Both Sample Types	P12672	43 kDa receptor-associated protein of the synapse	Rapsn	46.4kDa	17,25	17			17	8			4	10			4	11			4	9			12.5	10
	P58242	Acid sphingomyelinase-like phosphodiesterase 3b	Smpdl3b	51.6kDa					21	5			8,9	8			8	7			8	4			5	6.33333
	P68134	Actin, alpha skeletal muscle	Acta1	42.1kDa	17,25	18			17	8			4,5	9			4,5	8			4	6			13	7.66667
	P60710	Actin, cytoplasmic 1	Actb	41.7kDa	17,25	7			17	4							4	4							5.5	4
	Q8BSL7	ADP-ribosylation factor 2	Arf2	20.7kDa	14	5			14	9			1	9			1	6			1	10			7	8.33333
	P61750	ADP-ribosylation factor 4	Arf4	20.4kDa					14	3											1	3			3	3
	P62331	ADP-ribosylation factor 6	Arf6	20.1kDa	14	4			14	2			1	2			1	3							3	2.5
	P10107	Annexin A1	Anxa1	38.7kDa	17,25	14			16,17	5			4	7			4	7			4	7			9.5	7
	P07356	Annexin A2	Anxa2	38.7kDa	16,17,25	40			16,17	24			4	22			3,4	22			4	17			32	20.3333
	P97429	Annexin A4	Anxa4	36.0kDa	16	3			16	3			3	2			3	4							3	3
	P48036	Annexin A5	Anxa5	35.8kDa	16	8			16	8			3	4			3	5			3	3			8	4
	P17426	AP-2 complex subunit alpha-1	Ap2a1	107.7kDa	23	4			23	3							10	3			10	2			3.5	2.5
	Q9DBG3	AP-2 complex subunit beta	Ap2b1	104.6kDa	23	5			23	5			9,10	9			10	3			10	5			5	5.66667
	P84091	AP-2 complex subunit mu	Ap2m1	49.7kDa	19	3							6	3			6	4			6	4			3	3.66667
	Q8K2Q7	BRO1 domain-containing protein BROX	Brox	46.2kDa	17,25	5			17	2			4	2			4	2							3.5	2
	Q8BK63	Casein kinase I isoform alpha	Csnk1a1	38.9kDa	16,17,25	27			16,17	17			4	17			3,4	15			4	13			22	15
	Q9DC28	Casein kinase I isoform delta	Csnk1d	47.3kDa	19	7			19	6			6	10			6	11			6	8			6.5	9.66667
	P26231	Catenin alpha-1	Ctnna1	100.1kDa	23	5			23	6			9,10	12			9,10	9			9,10	9			5.5	10
	O35566	CD151 antigen	Cd151	28.2kDa	14,17,19,25	11			14	2											7	2			6.5	2
	P15379	CD44 antigen	Cd44	85.6kDa	21,22	9			21,22	8							1	4			1	5			8.5	4.5
	P60766	Cell division control protein 42 homolog	Cdc42	21.3kDa	14	6			14	6			1	3			1	2			1	3			6	2.66667
	Q921W0	Charged multivesicular body protein 1a	Chmp1a	21.6kDa					15	2							2	2							2	2
	Q9CQ10	Charged multivesicular body protein 3	Chmp3	25.2kDa	16	2			16	2			3	2			3	3			3	3			2	2.66667
	Q9D8B3	Charged multivesicular body protein 4b	Chmp4b	24.9kDa	16	2			16	8			3,4	9			3,4	10			4	5			5	8
	Q9Z0G9	Claudin-3	Cldn3	23.3kDa	14	3			14	3			1	3			1	3			1	4			3	3.33333
	P45591	Cofilin-2	Cfl2	18.7kDa	14	2			14	2			1	2			1	3			1	2			2	2.33333
	Q8K1A6	Coiled-coil and C2 domain-containing protein 1A	Cc2d1a	103.7kDa	24	7			24	7			10	7			10	9			10	9			7	8.33333
	Q61072	Disintegrin and metalloproteinase domain-containing protein 9	Adam9	92.0kDa	21	4			21	7			8	2			8	3							5.5	2.5
	P11531	Dystrophin	Dmd	425.8kDa	17,25	5							6,7,9,13	8			4	2							5	5
	Q8C863	E3 ubiquitin-protein ligase Itchy	Itch	99.0kDa	23	10			23	11			10	9			10	11			10	14			10.5	11.3333
	P10126	Elongation factor 1-alpha 1	Eef1a1	50.1kDa	19	2			19	2			6	3			6	2			6	3			2	2.66667
	P62631	Elongation factor 1-alpha 2	Eef1a2	50.5kDa	19	5			19	4			6	3			6	3			6	5			4.5	3.66667
	P58252	Elongation factor 2	Eef2	95.3kDa	22,23	17			22	11			9	19			9	24			9	23			14	22
	Q62419	Endophilin-A2	Sh3gl1	41.5kDa	19	8			19	8			6	2			6	3			6	3			8	2.66667
	P63242	Eukaryotic translation initiation factor 5A-1	Eif5a	16.8kDa	14	4			14	6			1	2			1	4			1	4			5	3.33333
	Q8CIB5	Fermitin family homolog 2	Fermt2	77.8kDa	21	3			21	7			8	12			8	10			8	13			5	11.6667
	P08752	Guanine nucleotide-binding protein G(i) subunit alpha-2	Gnai2	40.5kDa	17,25	7			17	2			4	4			4	3			4	4			4.5	3.66667
	Q61011	Guanine nucleotide-binding protein G(I)/G(S)/G(T) subunit beta-3	Gnb3	32.7kDa					16	6			3	3			3	4							6	3.5
	Q61696	Heat shock 70 kDa protein 1A	Hspa1a	70.1kDa	20	2			20	2			8	4			8	3			7,8	6			2	4.33333
	P63017	Heat shock cognate 71 kDa protein	Hspa8	70.9kDa	20,21	15			20,21	20			6,7,8	64			6,7,8	62			6,7,8	52			17.5	59.3333
	P16056	Hepatocyte growth factor receptor	Met	153.5kDa	24	5			24	3			6	4			6,7	7			6	2			4	4.33333
	Q62470	Integrin alpha-3	Itga3	116.7kDa	16,23,24	25			16,23,24	16			1,3,8,10	30			3,8,10	31			3,8,10	18			20.5	26.3333
	P11688	Integrin alpha-5	Itga5	115.1kDa	24	11			14,24	13			1,8,9	12			1,8,9	17			8,9	6			12	11.6667
	P43406	Integrin alpha-V	Itgav	115.3kDa	14,24	36			24	26			1,8	6			8	3			8	7			31	5.33333
	P09055	Integrin beta-1	Itgb1	88.2kDa	23,24	40			23,24	26			1,4,6,7,8,9,10	73			1,4,6,7,8,9,10	70			1,4,6,7,8,9,10,11	61			33	68
	Q9D8B7	Junctional adhesion molecule C	Jam3	34.8kDa	17,25	17			17	9			1	6			1	2							13	4
	Q8CIP4	MAP/microtubule affinity-regulating kinase 4	Mark4	82.6kDa	22	3							9	3			9	4			9	4			3	3.66667
	Q9DBV4	Matrix-remodeling-associated protein 8	Mxra8	49.8kDa	19	5			19	2							1	3							3.5	3
	P26041	Moesin	Msn	67.8kDa	21	9			21	7			8	20			8	16			8	15			8	17
	Q6ZWR6	Nesprin-1	Syne1	1009.9kDa	19,21,27	6			14,21,27	6			1,6	4											6	4
	P13595	Neural cell adhesion molecule 1	Ncam1	119.4kDa	24,26	50			16,24,25,26	60			3,4	8			3	7			3	4			55	6.33333
	P57716	Nicastrin	Ncstn	78.5kDa	24	2			24	3			11	3			11	3			11	3			2.5	3
	O54901	OX-2 membrane glycoprotein	Cd200	31.3kDa	19	6			19	5			6	4			6	4			6	4			5.5	4
	P17742	Peptidyl-prolyl cis-trans isomerase A	Ppia	18.0kDa	14,20	25			14,20	18			1	16			1	16			1	16			21.5	16
	P26883	Peptidyl-prolyl cis-trans isomerase FKBP1A	Fkbp1a	11.9kDa					14	2			1	2			1	2			1	3			2	2.33333
	Q9D868	Peptidyl-prolyl cis-trans isomerase H	Ppih	20.5kDa					14	2			1	2			1	2			1	3			2	2.33333
	P09411	Phosphoglycerate kinase 1	Pgk1	44.6kDa	17,25	7			17	2			4	2											4.5	2
	Q08857	Platelet glycoprotein 4	Cd36	52.7kDa	21,22	16			21,22	13			6,8,9	24			6,8,9	19			4,6,8,9	24			14.5	22.3333
	B2RXS4	Plexin B2	Plxnb2	206.2kDa	21	3			21	3			8	8			8	9			8	3			3	6.66667
	P70206	Plexin-A1	Plxna1	211.1kDa	26	3			26	3			7	7			7	7			7	6			3	6.66667
	Q8VHK9	Probable ATP-dependent RNA helicase DHX36	Dhx36	113.9kDa					23	2			10	3			10	2			10	3			2	2.66667
	P62962	Profilin-1	Pfn1	15.0kDa	14	4			14	4			1	3			1	2			1	3			4	2.66667
	Q9WU78	Programmed cell death 6-interacting protein	Pdcd6ip	96.0kDa	22,23	34			22,23	32			9,10	33			9	29			9,10	34			33	32
	Q99JB8	Protein kinase C and casein kinase II substrate protein 3	Pacsin3	48.6kDa	19	7			19	6			6	9			6	5			6	8			6.5	7.33333
	P50543	Protein S100-A11	S100a11	11.1kDa					14	2							1	2							2	2
	Q8K2A1	PTB domain-containing engulfment adapter protein 1	Gulp1	34.5kDa	17,25	10			17	3			4	5			4	6			4	4			6.5	5
	P16381	Putative ATP-dependent RNA helicase Pl10	D1Pas1	73.1kDa	21	2			21	5			8	8			8	8			8	7			3.5	7.66667
	Q61598	Rab GDP dissociation inhibitor beta	Gdi2	50.5kDa	19	7			19	6			6	6			6	4			6	4			6.5	4.66667
	Q01730	Ras supressor protein 1	Rsu1	31.6kDa	15	2							2	2											2	2
	P63001	Ras-related C3 botulinum toxin substrate 1	Rac1	21.5kDa	14	5			14	7			1	7			1	6			1	6			6	6.33333
	P61027	Ras-related protein Rab-10	Rab10	22.5kDa	14	7			14	6			1	10			1	8			1	5			6.5	7.66667
	P46638	Ras-related protein Rab-11B	Rab11b	24.5kDa	14	3			14	7			1	6			1	4			1	5			5	5
	P62821	Ras-related protein Rab-1A	Rab1a	22.7kDa	14	2			14	2							1	3							2	3
	Q6PHN9	Ras-related protein Rab-35	Rab35	23.0kDa	14	5			14	7			1	7			1	3			1	3			6	4.33333
	P61021	Ras-related protein Rab-5B	Rab5b	23.7kDa	14	3			14	2			1	2			1	3			1	2			2.5	2.33333
	P51150	Ras-related protein Rab-7a	Rab7a	23.5kDa	14	10			14	8			1	7			1	5			1	8			9	6.66667
	Q9JIW9	Ras-related protein Ral-B	Ralb	23.3kDa					14	2			1	2							1	4			2	3
	P62835	Ras-related protein Rap-1A	Rap1a	21.0kDa	14	8			14	6			1	5			1	5			1	7			7	5.66667
	P61226	Ras-related protein Rap-2b	Rap2b	20.5kDa	14	6			14	5			1	3			1	3			1	2			5.5	2.66667
	P10833	Ras-related protein R-Ras	Rras	23.8kDa	14	3			14	3			1	2			1	2			1	2			3	2
	P62071	Ras-related protein R-Ras2	Rras2	23.4kDa	14	5			14	6			1	3			1	6			1	5			5.5	4.66667
	Q62159	Rho-related GTP-binding protein RhoC	Rhoc	22.0kDa	14	3			14	7			1	5			1	7							5	6
	P84096	Rho-related GTP-binding protein RhoG	Rhog	21.3kDa					14	3			1	3			1	3			1	2			3	2.66667
	Q9WV02	RNA-binding motif protein, X chromosome	Rbmx	42.3kDa	19	2							6	2											2	2
	P97321	Seprase	Fap	87.9kDa	22,23	7			23	3			9	5			9	5			9	5			5	5
	Q9JLM8	Serine/threonine-protein kinase DCLK1	Dclk1	84.2kDa	17,25	9			17	4			4	5			4	4			4	3			6.5	4
	Q05512	Serine/threonine-protein kinase MARK2	Mark2	86.3kDa	21,22	11			21,22	10			8,9	24			8,9	24			8,9	17			10.5	21.6667
	Q8VDN2	Sodium/potassium-transporting ATPase subunit alpha-1	Atp1a1	113.0kDa	23,24	11			23,24	12			9,10,11	18			9,10,11	15			9,10,11	12			11.5	15
	Q6PIC6	Sodium/potassium-transporting ATPase subunit alpha-3	Atp1a3	111.7kDa	23,24	8			22,23,24	10			9,10,11	13			9,10,11	12			9,10,11	9			9	11.3333
	Q91ZR2	Sorting nexin-18	Snx18	67.9kDa	21	8			21	8			8	14			8	12			8	7			8	11
	Q91VH2	Sorting nexin-9	Snx9	66.5kDa	21	5			21	6			8	13			8	9			8	7			5.5	9.66667
	Q8VIJ6	Splicing factor, proline- and glutamine-rich	Sfpq	75.4kDa					23	2			9	4			9	4			9	3			2	3.66667
	Q78PY7	Staphylococcal nuclease domain-containing protein 1	Snd1	102.1kDa	23	9			23	7			10	10			10	9			10	10			8	9.66667
	Q62465	Synaptic vesicle membrane protein VAT-1 homolog	Vat1	43.1kDa	19	2			19	2			6	2											2	2
	P18828	Syndecan-1	Sdc1	32.9kDa					26	2			1	2			1	2			1	3			2	2.33333
	P70452	Syntaxin-4	Stx4	34.2kDa	16	2			16	4			3	4			3,4	8			3	3			3	5
	O08992	Syntenin-1	Sdcbp	32.4kDa	16	3			16	4			3,4	4			3	5			3,4	7			3.5	5.33333
	Q62283	Tetraspanin-7	Tspan7	27.5kDa	16,17,19,21,22,24,25	36			16,17,21	17			4,11	6			3,11	6			4	6			26.5	6
	P10639	Thioredoxin	Txn	11.7kDa					14	3											1	2			3	2
	Q9WVA4	Transgelin-2	Tagln2	22.4kDa	14	3			14	5			1	4			1	7			1	5			4	5.33333
	Q61187	Tumor susceptibility gene 101 protein	Tsg101	44.1kDa	19	8			19	5			6	5			6	9			6	10			6.5	8
	P62984	Ubiquitin-60S ribosomal protein L40	Uba52	14.7kDa	14,16,17,18,19,20,21,22,23,24,25,26	61			14,16,17,18,19,20,21,22,23,24,26	47			1,3,4,5,6,7,8,9,10,11,13	56			1,3,4,5,6,7,8,9,11,13	49			1,3,4,5,6,7,8,9,10,11,13	37			54	47.3333
	Q9WTI7	Unconventional myosin-Ic	Myo1c	121.9kDa					23	2			10	7			10	12			10	6			2	8.33333
	P46467	Vacuolar protein sorting-associated protein 4B	Vsp4b	49.4kDa					19	2			6	5			6	4			6	2			2	3.66667
	P63024	Vesicle-associated membrane protein 3	Vamp3	11.5kDa	14	2			14	4			1	3			1	2			1	3			3	2.66667
	Q64727	Vinculin	Vcl	116.7kDa	24	2			24	2							10	2							2	2
	Q8BVD6	X-prolyl aminopeptidase (Aminopeptidase P) 2, membrane-bound	Xpnpep2	76.4kDa	22	2			22	2			9	3			9	4			9	3			2	3.33333
Identified Only in Whole Virions	P63101	14-3-3 protein zeta/delta	Ywhaz	27.8kDa	15	2																			2
	P10852	4F2 cell-surface antigen heavy chain	Slc3a2	58.3kDa	21,22	6			21,22	6															6
	P84078	ADP-ribosylation factor 1	Arf1	20.7kDa					14	2															2
	P17182	Alpha-enolase	Eno1	47.1kDa	19	2																			2
	P82350	Alpha-sarcoglycan	Sgca	43.3kDa	19	2																			2
	P12023	Amyloid beta A4 protein	App	86.7kDa					24	3															3
	Q6DFX2	Anthrax toxin receptor 2	Antxr2	53.2kDa	19	3			19	2															2.5
	Q99MQ4	Asporin	Aspn	42.6kDa	25	3																			3
	P18572	Basigin	Bsg	42.4kDa	19	2																			2
	Q9WTR5	Cadherin-13	Cdh13	78.3kDa	23,24	12			22,23,24	18															15
	Q61490	CD166 antigen	Alcam	65.1kDa	23	5			23	5															5
	Q61147	Ceruloplasmin	Cp	121.2kDa	24	2			24	2															2
	Q8VHY0	Chondroitin sulfate proteoglycan 4	Cspg4	252.4kDa	24,26,27	73			26,27	69															71
	P11087	Collagen alpha-1(I) chain	Col1a1	138.0kDa	23	2																			2
	Q9CXI3	DBH-like monooxygenase protein 1	Moxd1	69.7kDa	21,22	13			21,22	13															13
	P82347	Delta-sarcoglycan	Sgcd	32.1kDa	16	3			16	2															2.5
	Q8K135	Dyslexia-associated protein KIAA0319-like protein	Kiaa0319l	115.3kDa	24	2																			2
	Q03145	Ephrin type-A receptor 2	Epha2	108.8kDa	24	8			24	6															7
	P54763	Ephrin type-B receptor 2	Ephb2	110.8kDa	24	2																			2
	P48024	Eukaryotic translation initiation factor 1	Eif1	12.7kDa					14	2															2
	P11276	Fibronectin	Fn1	272.5kDa	26,27	23			26,27	27															25
	Q8BLU0	Fibronectin leucine rich transmembrane protein 2	Flrt2	73.9kDa	22	7			22	5															6
	Q61543	Golgi apparatus protein 1	Glg1	133.7kDa	24	3			24	2															2.5
	Q01721	Growth arrest-specific protein 1	Gas1	35.7kDa	16,17,25	7			17	4															5.5
	Q60631	Growth factor receptor-bound protein 2	Grb2	25.2kDa					14	2															2
	P62874	Guanine nucleotide-binding protein G(I)/G(S)/G(T) subunit beta-1	Gnb1	37.4kDa	16	2			16	3															2.5
	P27601	Guanine nucleotide-binding protein subunit alpha-13	Gna13	44.1kDa	25	2																			2
	P11499	Heat shock protein HSP 90-beta	Hsp90ab1	83.3kDa	22	2																			2
	P22752	Histone H2A type 1	Multiple	14.1kDa	14	5			14	4															4.5
	P10853	Histone H2B type 1-F/J/L	Multiple	13.9kDa	14	2			14	3															2.5
	P84228	Histone H3.2	Multiple	15.4kDa	14	2			14	3															2.5
	P62806	Histone H4	Multiple	11.4kDa	14	3			14	5															4
	Q8R366	Immunoglobulin superfamily member 8	Igsf8	65.0kDa	19,21,22	30			19,21,22	23															26.5
	Q80V26	Inositol monophosphatase 3	Impad1	38.6kDa	17,25	5																			5
	Q61738	Integrin alpha-7	Itga7	129.4kDa	20	3			20	2															2.5
	Q9QUM0	Integrin alpha-IIb	Itga2b	112.7kDa	24	2			24	2															2
	O54890	Integrin beta-3	Itgb3	86.7kDa	22	3			22	3															3
	O70309	Integrin beta-5	Itgb5	87.9kDa	22,23	11			22,23	19															15
	P21956	Lactadherin	Mfge8	51.3kDa					19	2															2
	Q80X72	Leucine-rich repeat-containing protein 15	Lrrc15	64.2kDa					22	3															3
	P35951	Low-density lipoprotein receptor	Ldlr	95.1kDa	24	3			24	3															3
	Q8VI56	Low-density lipoprotein receptor-related protein 4	Lrp4	212.0kDa	26	22			26	22															22
	Q9JLB0	MAGUK p55 subfamily member 6	Mpp6	62.6kDa					21	2															2
	P04925	Major prion protein	Prnp	28.0kDa					16	4															4
	P10810	Monocyte differentiation antigen CD14	Cd14	39.2kDa	19	3			19	2															2.5
	Q8VDD5	Myosin-9	Myh9	226.4kDa	19	2																			2
	O35375	Neuropilin-2	Nrp2	104.6kDa	24	7			24	3															5
	P30412	Peptidyl-prolyl cis-trans isomerase C	Ppic	22.8kDa	14	4			14	5															4.5
	Q9JLB9	Poliovirus receptor-related protein 3	Pvrl3	60.6kDa	22	2																			2
	P60335	Poly(rC)-binding protein 1	Pcbp1	37.5kDa	25	2																			2
	Q91ZX7	Prolow-density lipoprotein receptor-related protein 1	Lrp1	504.7kDa	21,22,23,24,26,27	257			21,22,23,24,26,27	229															243
	Q9WV91	Prostaglandin F2 receptor negative regulator	Ptgfrn	98.7kDa	23,24	41			24	25															33
	Q91VU0	Protein FAM3C	Fam3c	24.8kDa	14	2			14	2															2
	F2Z4A3	Protein Fat1	Fat1	506.3kDa	27	2			27	2															2
	Q91XX1	Protocadherin gamma C3	Pcdhgc3	101.0kDa	24	2			24	2															2
	Q99PJ1	Protocadherin-15	Pcdh15	214.8kDa					23	2															2
	P35282	Ras-related protein Rab-21	Rab21	24.1kDa	14	4																			4
	P35278	Ras-related protein Rab-5C	Rab5c	23.4kDa	14	2																			2
	Q8BU31	Ras-related protein Rap-2c	Rap2c	20.7kDa	14	2			14	2															2
	O35609	Secretory carrier-associated membrane protein 3	Scamp3	38.4kDa	17	2																			2
	Q9QUR8	Semaphorin-7A	Sema7a	75.0kDa	21	13			21,22	17															15
	Q9JIS8	Solute carrier family 12 member 4	Slc12a4	120.6kDa	24	2																			2
	Q9DBX3	Sushi domain-containing protein 2	Susd2	90.6kDa					15	2															2
	P43407	Syndecan-2	Sdc2	22.1kDa	26	4																			4
	O35988	Syndecan-4	Sdc4	21.5kDa	24	2																			2
	Q9ER00	Syntaxin-12	Stx12	31.2kDa	16	2																			2
	Q3UHK6	Teneurin-4	Odz4	308.4kDa					26	3															3
	Q8QZY6	Tetraspanin-14	Tspan14	30.7kDa	14	2																			2
	Q62351	Transferrin receptor protein 1	Tfrc	85.7kDa	22,23	5			22,23,25	10															7.5
	Q5FWI3	Transmembrane protein 2	Tmem2	153.8kDa	24	6			24,25	16															11
	Q9Z0L0	Trophoblast glycoprotein	Tpbg	46.4kDa					21	2															2
	Q9CWF2	Tubulin beta-2B chain	Tubb2b	50.0kDa	19	2																			2
	O08532	Voltage-dependent calcium channel subunit alpha-2/delta-1	Cacna2d1	124.6kDa	14,24	43			24	33															38
	Q6PHS9	Voltage-dependent calcium channel subunit alpha-2/delta-2	Cacna2d2	130.4kDa	24	3			24	3															3
Identified Only in ProK-treated Virions	Q9DB05	Alpha-soluble NSF attachment protein	Napa	33.2kDa									3	2												2
	P14824	Annexin A6	Anxa6	75.9kDa													7	2								2
	P17427	AP-2 complex subunit alpha-2	Ap2a2	104.1kDa									9	4			9	3			9	4				3.66667
	P61222	ATP-binding cassette sub-family E member 1	Abce1	67.3kDa									7	7			7	7			7	4				6
	Q06138	Calcium-binding protein 39	Cab39	39.8kDa													4	2								2
	Q5M8N0	CB1 cannabinoid receptor-interacting protein 1	Cnrip1	18.6kDa													1	2								2
	Q9JLQ0	CD2-associated protein	Cd2ap	70.4kDa													8	2								2
	Q9DB34	Charged multivesicular body protein 2a	Chmp2a	25.1kDa													3	3			3	2				2.5
	Q9D7S9	Charged multivesicular body protein 5	Chmp5	24.6kDa									3	2			3	2								2
	P18760	Cofilin-1	Cfl1	18.6kDa									1	2												2
	Q8BRN9	Coiled-coil and C2 domain-containing protein 1B	Cc2d1b	93.1kDa																	7	2				2
	P31428	Dipeptidase 1	Dpep1	45.7kDa																	7	2				2
	Q62371	Discoidin domain-containing receptor 2	Ddr2	96.5kDa									7	2												2
	O35598	Disintegrin and metalloproteinase domain-containing protein 10	Adam10	84.0kDa									1	4			1	3			1	2				3
	Q9Z321	DNA topoisomerase 3-beta-1	Top3b	97.0kDa									9	2												2
	P28352	DNA-(apurinic or apyrimidinic site) lyase	Apex1	35.5kDa													4	2								2
	Q9QYJ0	DnaJ homolog subfamily A member 2	Dnaja2	45.7kDa													6	2			6	3				2.5
	Q9QYJ3	DnaJ homolog subfamily B member 1	Dnajb1	38.2kDa									4	2			4	3			4	5				3.33333
	Q9QYI3	DnaJ homolog subfamily C member 7	Dnajc7	56.5kDa													7	2								2
	Q6NZB0	DnaJ homolog subfamily C member 8	Dnajc8	29.8kDa																	3	3				3
	Q9CUN6	E3 ubiquitin-protein ligase SMURF1	Smurf1	83.4kDa									8	2												2
	A2A5Z6	E3 ubiquitin-protein ligase SMURF2	Smurf2	86.2kDa									8	4							8	3				3.5
	Q922B6	E3 ubiquitin-protein ligase TRAF7	Traf7	66.5kDa													8	2								2
	Q9WVK4	EH domain-containing protein 1	Ehd1	60.6kDa									7	16			7	18			7	16				16.6667
	Q8BH64	EH domain-containing protein 2	Ehd2	61.2kDa									7	13			7	12			7	9				11.3333
	Q9QXY6	EH domain-containing protein 3	Ehd3	60.8kDa									7	3			7	4			7	5				4
	Q9EQP2	EH domain-containing protein 4	Ehd4	61.5kDa									7	16			7	18			7	18				17.3333
	Q9JMG1	Endothelial differentiation-related factor 1	Edf1	16.4kDa													1	2								2
	Q9Z0N1	Eukaryotic translation initiation factor 2 subunit 3, X-linked	Eif2s3x	51.1kDa													6	2								2
	Q8BJW6	Eukaryotic translation initiation factor 2A	Eif2a	64.4kDa													7	4								4
	P26040	Ezrin	Ezr	69.4kDa																	8	2				2
	P17183	Gamma-enolase	Eno2	47.3kDa									6	3												3
	B2RWW6	GCN1 general control of amino-acid synthesis 1-like 1 (Yeast)	Gcn1l1	293kDa									4	2												2
	Q9CYL5	Golgi-associated plant pathogenesis-related protein 1	Glipr2	17.1kDa									1	2												2
	Q923Z0	G-protein coupled receptor family C group 5 member B	Gprc5b	45.9kDa													1	3								3
	P32883	GTPase KRas	Kras	21.7kDa													1	2								2
	P21278	Guanine nucleotide-binding protein subunit alpha-11	Gna11	42.0kDa																	4	2				2
	P01942	Hemoglobin subunit alpha	Hba	15.1kDa																	1	2				2
	Q9CX00	IST1 homolog	Ist1	39.5kDa									6	2			6	2								2
	Q02257	Junction plakoglobin	Jup	81.8kDa													8	2								2
	Q9QUJ7	Long-chain-fatty-acid--CoA ligase 4	Acsl4	79.1kDa									8	3			8	2								2.5
	P79621	MHC class II transactivator	Ciita	127.5kDa													3	3								3
	Q9JM52	Misshapen-like kinase 1	Mink1	147.3kDa									11	3			11	5			11	2				3.33333
	P97820	Mitogen-activated protein kinase kinase kinase kinase 4	Map4k4	140.6kDa													11	2								2
	O08539	Myc box-dependent-interacting protein 1	Bin1	64.5kDa									6	2												2
	O35516	Neurogenic locus notch homolog protein 2	Notch2	265.3kDa									10	2												2
	P97300	Neuroplastin	Nptn	44.4kDa									7	2			7	2								2
	Q8R1F1	Niban-like protein 1	Fam129b	84.8kDa									9	3			9	3			9	2				2.66667
	Q99K48	Non-POU domain-containing octamer-binding protein	Nono	54.5kDa									7	4			7	4			7	3				3.66667
	Q7M6Y3	Phosphatidylinositol-binding clathrin assembly protein	Picalm	71.5kDa													7	2								2
	Q9WV95	Pleckstrin homology-like domain family A member 3	Phlda3	13.7kDa																	1	2				2
	Q9QXS1	Plectin	Plec	534.2kDa													13	2								2
	P11103	Poly [ADP-ribose] polymerase 1	Parp1	113.1kDa									10	2			10	4			10	3				3
	Q91YR7	Pre-mRNA-processing factor 6	Prpf6	106.7kDa									10	3												3
	P54823	Probable ATP-dependent RNA helicase DDX6	Ddx6	54.2kDa									6	3												3
	E9Q0T8	Protein Dnahc7a	Dnahc7a	460.9kDa																	6	2				2
	Q922G2	Protein FAM76A	Fam76a	35.1kDa																	3	3				3
	Q9WVE8	Protein kinase C and casein kinase substrate in neurons protein 2	Pacsin2	55.8kDa									7	9			7	13			7	9				10.3333
	O70274	Protein tyrosine phosphatase type IVA 2	Ptp4a2	19.1kDa									1	2			1	2			1	3				2.33333
	Q04736	Proto-oncogene tyrosine-protein kinase Yes	Yes1	60.6kDa									7	12			7	11			7	13				12
	O89086	Putative RNA-binding protein 3	Rbm3	16.6kDa																	1	2				2
	P55258	Ras-related protein Rab-8A	Rab8a	23.7kDa									1	6			1	2			1	4				4
	P18052	Receptor-type tyrosine-protein phosphatase alpha	Ptpra	93.7kDa																	9	2				2
	Q8K021	Secretory carrier-associated membrane protein 1	Scamp1	38.0kDa													3	2								2
	Q07832	Serine/threonine-protein kinase PLK1	Plk1	68.3kDa													7	2			7	2				2
	Q4VAA7	Sorting nexin-33	Snx33	65.3kDa									8	7			8	5			8	3				5
	O09044	Synaptosomal-associated protein 23	Snap23	23.3kDa									1	2												2
	O08599	Syntaxin-binding protein 1	Stxbp1	67.6kDa																	7	2				2
	Q60770	Syntaxin-binding protein 3	Stxbp3	67.9kDa									7	3			7	5			7	4				4
	P10711	Transcription elongation factor A protein 1	Tcea1	33.9kDa									4	3			4	2			4	3				2.66667
	Q00993	Tyrosine-protein kinase receptor UFO	Axl	98.3kDa									6	2							6	3				2.5
	P68037	Ubiquitin-conjugating enzyme E2 L3	Ube2l3	17.9kDa																	1	2				2
	P61089	Ubiquitin-conjugating enzyme E2 N	Ube2n	17.1kDa									1	2			1	2			1	2				2
	Q9CZY3	Ubiquitin-conjugating enzyme E2 variant 1	Ube2v1	16.4kDa																	1	3				3
	Q5SYD0	Unconventional myosin-Id	Myo1d	116.1kDa													10	2								2
	Q9D1C8	Vacuolar protein sorting-associated protein 28 homolog	Vps28	25.5kDa									1	2							1	2				2
aUniProtKB
bAs indicated in Figure 3
